# Supplementary material for: Multi-Tissue Transcriptomic-Informed In Silico Investigation of Drugs for the Treatment of Dengue Fever Disease
Source: MDPI journal article supplement (doi:10.3390/v13081540), 2021-08-04
Supplement: s1 [file s1]

**Multi-tissue transcriptomic-informed *in silico* investigation of drugs for the treatment of dengue fever disease**

**Supplementary file**

Table S1- Additional information on the individuals from whom samples were collected for transcriptomics.

| Group    | ID number | Date of symptom onset | Date of death   | Age | Gender | Results of dengue RT-PCR (2018) and dengue nested RT-PCR (2014) in tissues | Province | Clinical classification |
|----------|-----------|-----------------------|-----------------|-----|--------|----------------------------------------------------------------------------|----------|-------------------------|
| Cases    | 37478     | 26 July 2018          | 31 July 2018    | 71  | F      | DENV-2 in spleen and liver                                                 | Camagüey | DSS                     |
|          | 39539     | 24 July 2018          | 28 July 2018    | 49  | F      | DENV-2 in spleen and liver                                                 | Camagüey | DSS                     |
|          | 39538     | 22 July 2018          | 30 July 2018    | 59  | M      | DENV-2 in liver                                                            | Camagüey | DSS                     |
|          | 900       | 7 October 2014        | 13 October 2014 | 66  | F      | DENV-2 in liver                                                            | Habana   | DSS                     |
|          | 875       | 21 October 2014       | 26 October 2014 | 48  | M      | DENV-2 in liver                                                            | Habana   | DSS                     |
| Controls | F1        | NA                    | July 2018       | 32  | M      | Negative                                                                   | Habana   | NA                      |
|          | F2        | NA                    | July 2018       | 24  | F      | Negative                                                                   | Habana   | NA                      |
|          | F4        | NA                    | July 2018       | 47  | M      | Negative                                                                   | Habana   | NA                      |

DWWS – dengue with warning signs.

NA- not applicable.

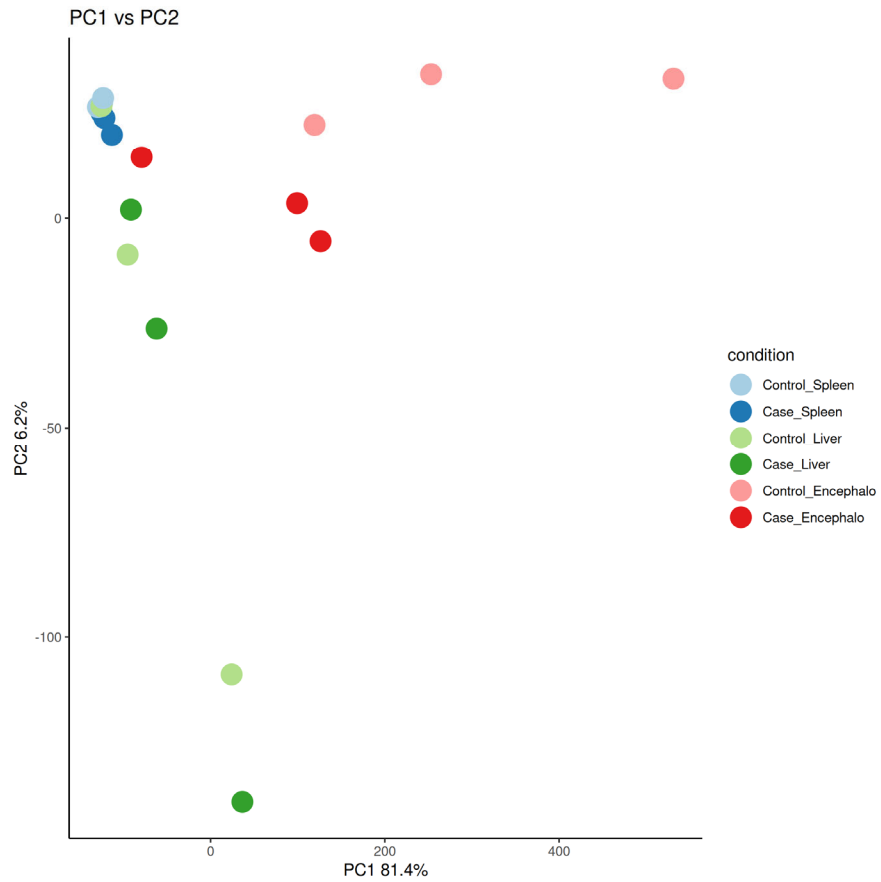

Figure S1- PCA plot (PC1 explaining 81.4% of variation vs. PC2 explaining 6.2% of variation) of the human transcriptomic profile of the spleen, liver and encephalon tissues.

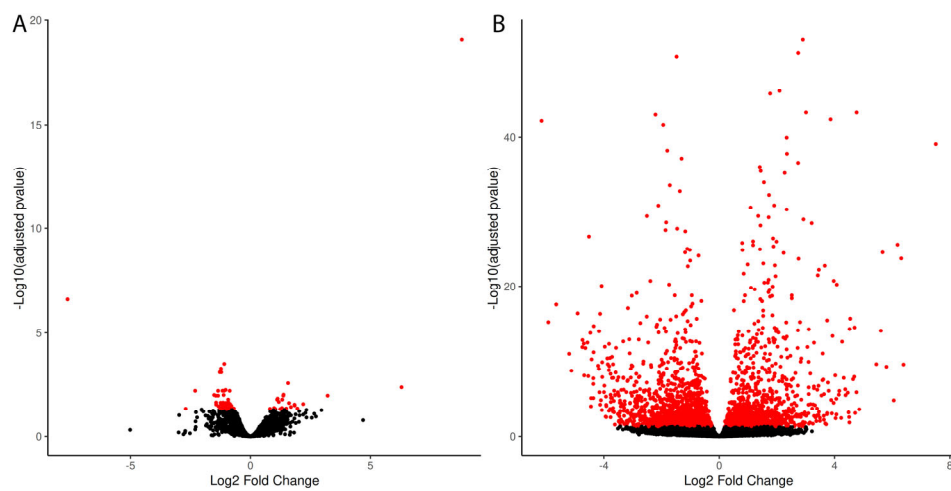

Figure S2- Volcano plots for the gene differential expression in the (A) spleen and (B) liver cell datasets. The points represented on red are the statistically significant genes. The negative side of the graph refers to downregulated genes in patients when compared to controls; the positive side of the graph refers to upregulated genes in patients when compared to controls.

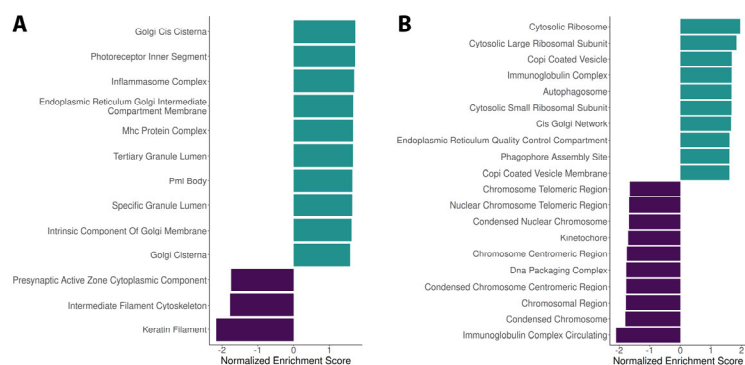

Figure S3- Top 20 Gene Ontology Cellular Component (GO-CC) pathways in the (A) Spleen and (B) Liver cells (cut-off value; nominal p-value < 0.05 and FDR < 0.25). Positive NES (in purple) show upregulated pathways in the infected individuals versus controls, while negative NES values (in green) mean downregulated pathways in the infected individuals versus controls.

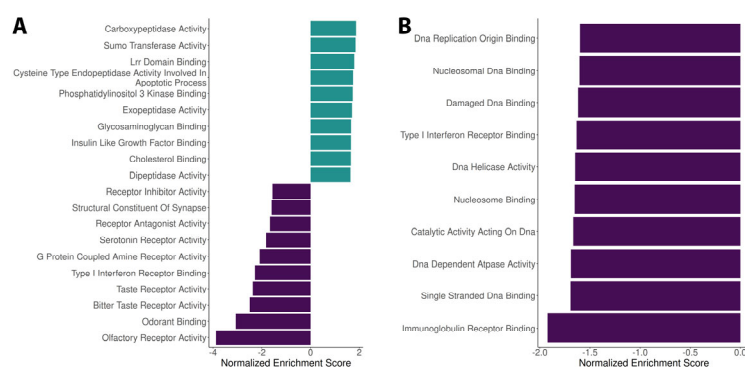

Figure S4- Top 20 Gene Ontology Molecular Function (GO-MF) pathways in the (A) Spleen and (B) Liver cells (cut-off value; nominal p-value < 0.05 and FDR < 0.25). Positive NES (in purple) show upregulated pathways in the infected individuals versus controls, while negative NES values (in green) mean downregulated pathways in the infected individuals versus controls.

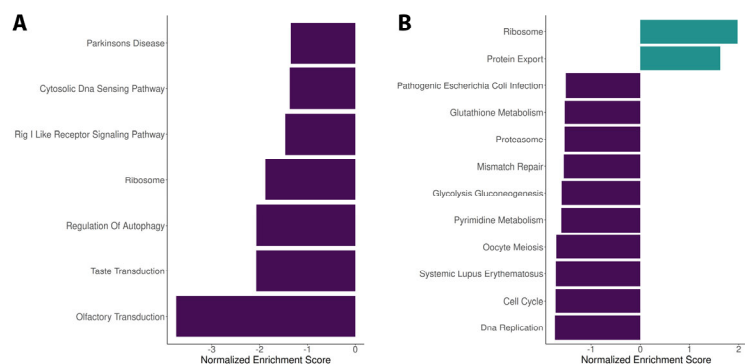

Figure S5- Top 20 significantly enriched KEGG pathways in the (A) Spleen and (B) Liver cells (cut-off value; nominal p-value < 0.05 and FDR < 0.25). Positive NES (in purple) show upregulated pathways in the infected individuals versus controls, while negative NES values (in green) mean downregulated pathways in the infected individuals versus controls.

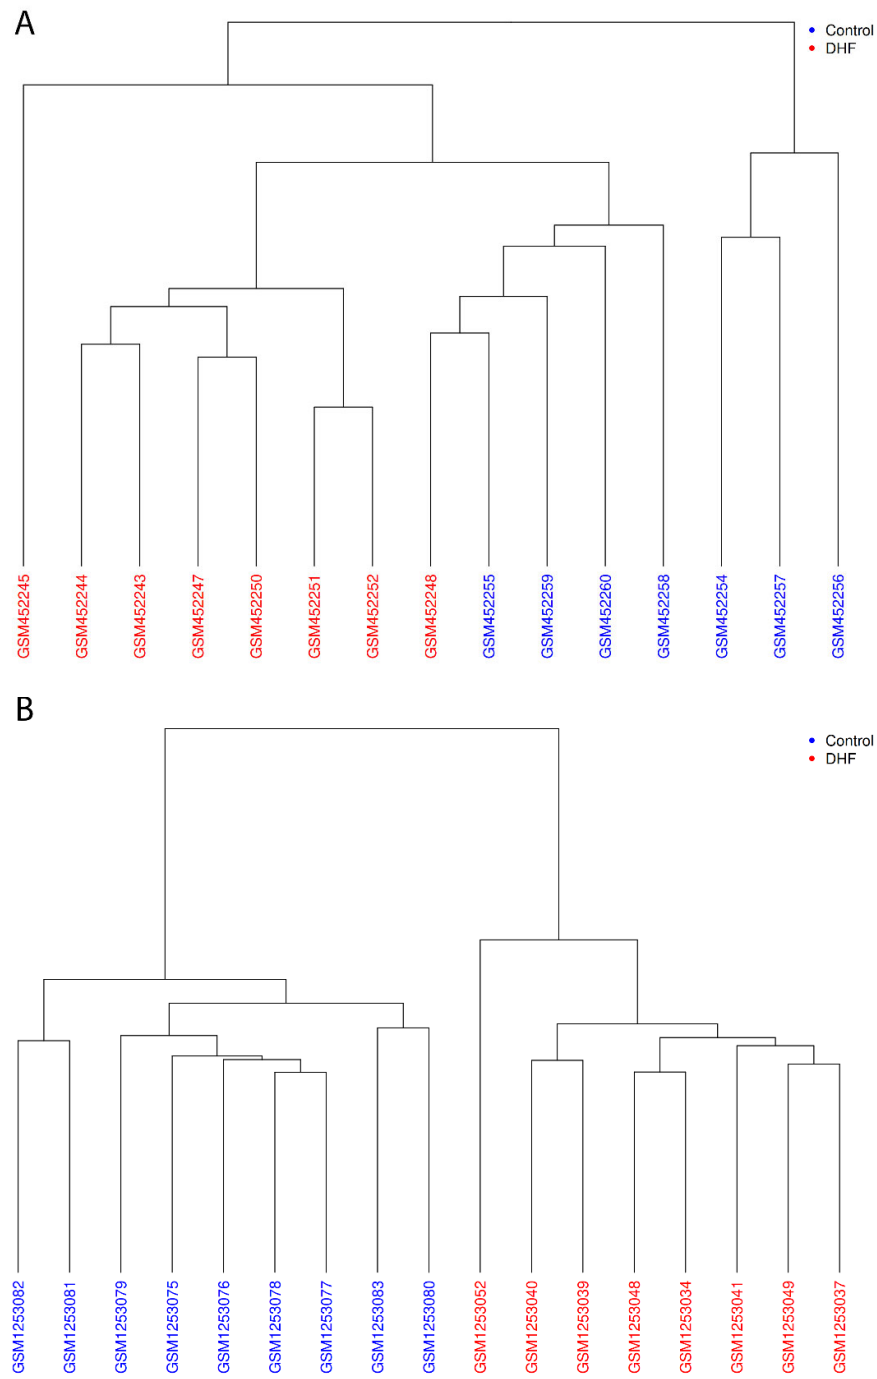

Figure S6- Dendrograms for the gene expression profiles in the two blood datasets: (A) GSE18090 and (B) GSE51808. The red points indicate the infected dengue haemorrhagic fever individuals (DHF), while the blue points indicate control samples.

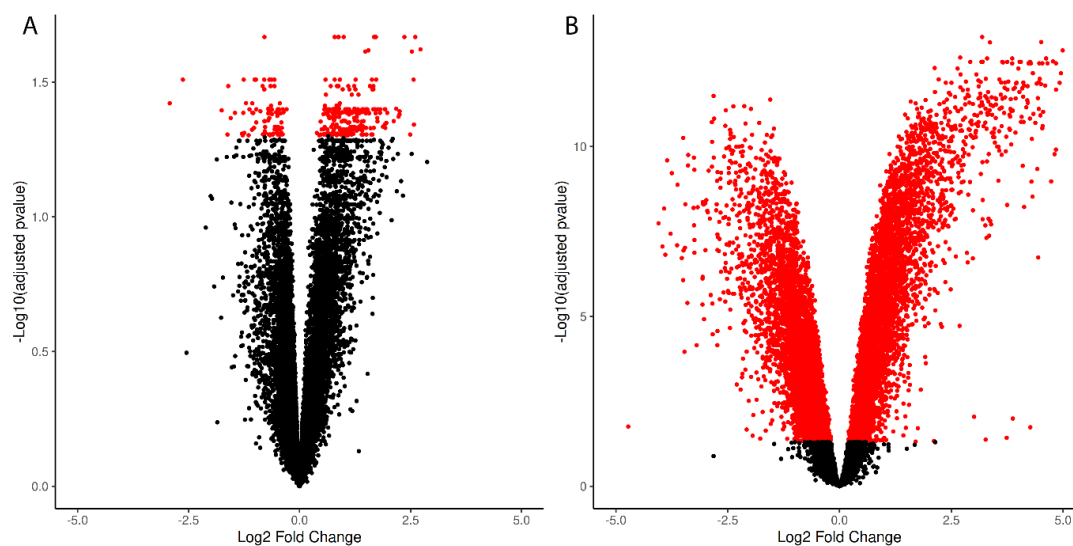

Figure S7- Volcano plots for the gene differential expression in the two blood datasets: (A) GSE18090 and (B) GSE51808. The points represented in red are the statistically significant genes. The negative side of the graph refers to downregulated genes in patients when compared to controls; the positive side of the graph refers to upregulated genes in patients when compared to controls.

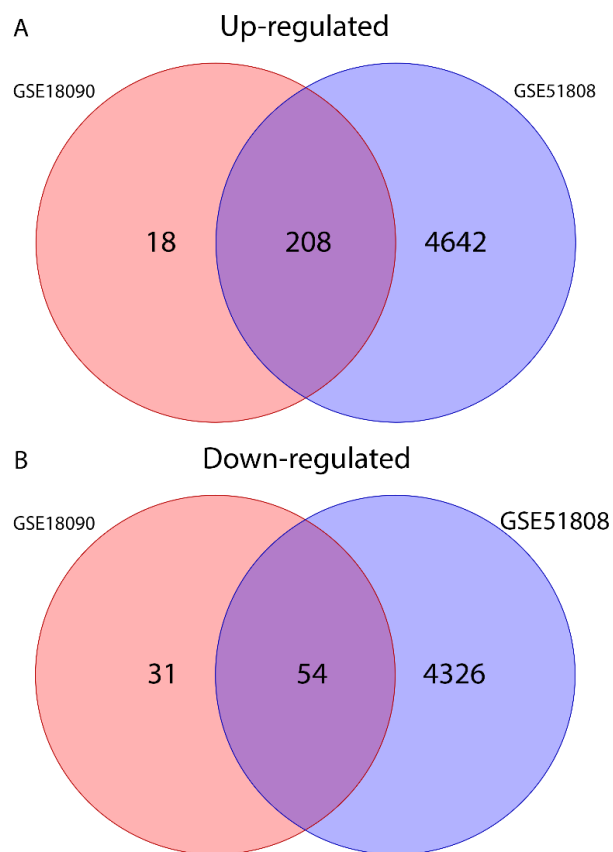

Figure S8- Venn diagrams of the upregulated (A) and downregulated (B) genes in the two blood datasets.

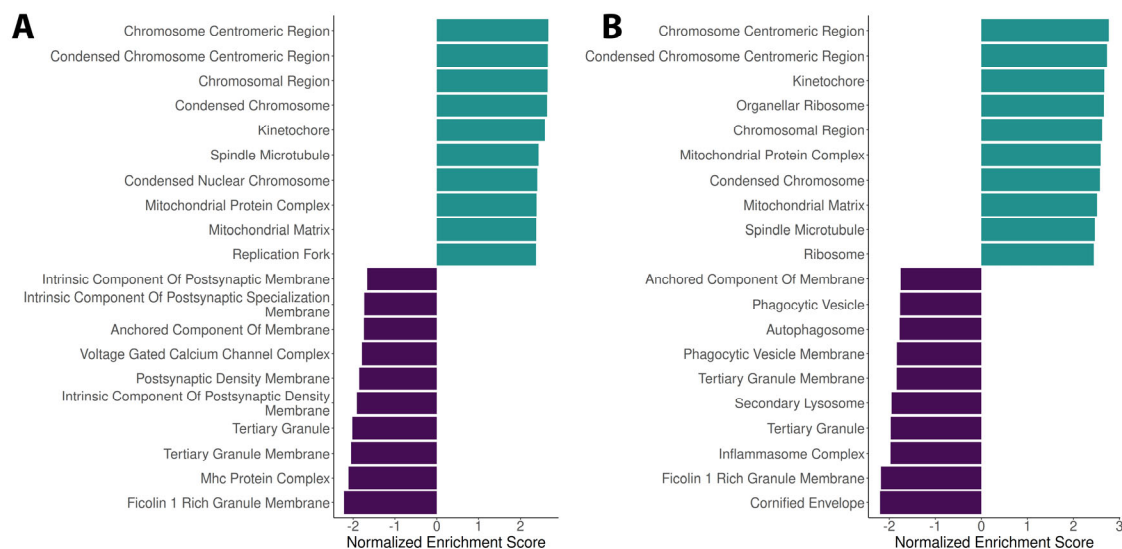

Figure S9- Top 20 Gene Ontology Cellular Component (GO-CC) pathways in the (A) GSE18090 and (B) GSE51808 (cut-off value; nominal p-value < 0.05 and FDR < 0.25). Positive NES (in purple) show upregulated pathways in the infected individuals versus controls, while negative NES values (in green) mean downregulated pathways in the infected individuals versus controls.

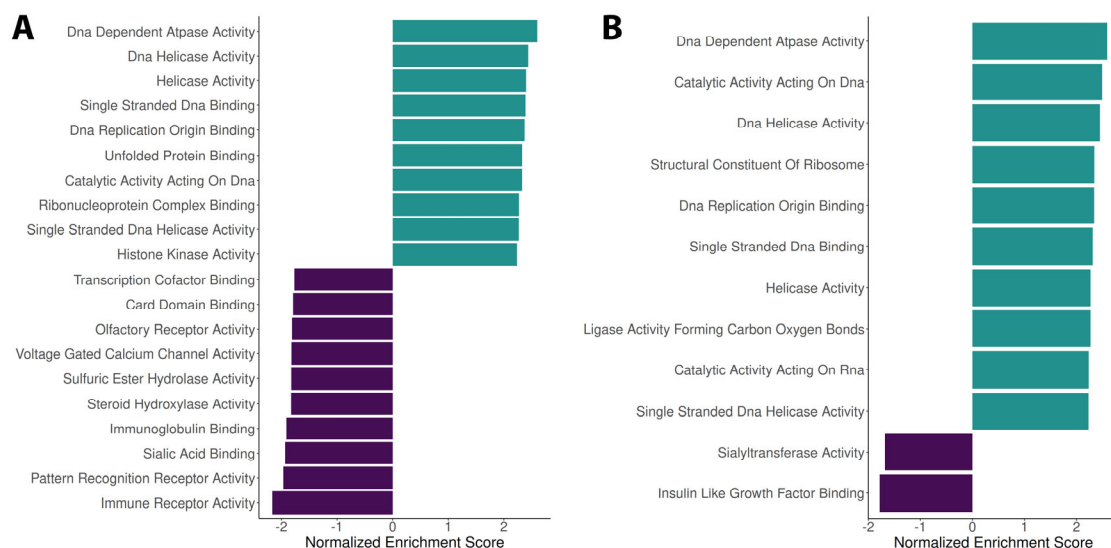

Figure S10- Top 20 Gene Ontology Molecular Function (GO-MF) pathways in the (A) GSE18090 and (B) GSE51808 (cut-off value; nominal p-value < 0.05 and FDR < 0.25). Positive NES (in purple) show upregulated pathways in the infected individuals versus controls, while negative NES values (in green) mean downregulated pathways in the infected individuals versus controls.

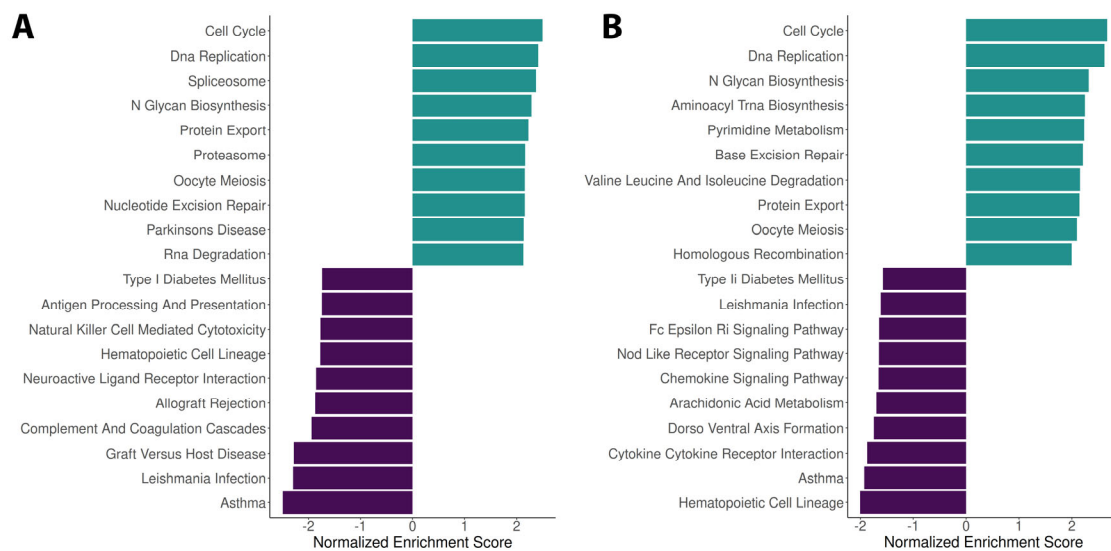

Figure S11- Top 20 significantly enriched KEGG pathways in the (A) GSE18090 and (B) GSE51808 (cut-off value; nominal p-value < 0.05 and FDR < 0.25). Positive NES (in purple) show upregulated pathways in the infected individuals versus controls, while negative NES values (in green) mean downregulated pathways in the infected individuals versus controls.
